# Supplementary material
Source: MDPI journal article supplement (https://www.mdpi.com/2076-3417/12/19/10057)
Supplement: s1 [file s1]

## Supplemental Information

**Table S1.** Comparative performance of the LO algorithm with swarm algorithms based on functions F1–F7

| Function |         | LO                | ABC        | SSA        | SCA               | BA         | FPA               | JAYA              | LEO-MPA           |
|----------|---------|-------------------|------------|------------|-------------------|------------|-------------------|-------------------|-------------------|
| F1       | Best    | <b>0.0000E+00</b> | 2.3350E-16 | 3.6020E-10 | <b>0.0000E+00</b> | 5.8240E-06 | 1.2930E-68        | <b>0.0000E+00</b> | <b>0.0000E+00</b> |
|          | Worst   | <b>0.0000E+00</b> | 4.5280E-16 | 1.2280E-09 | <b>0.0000E+00</b> | 1.1330E-03 | 3.3460E-60        | <b>0.0000E+00</b> | <b>0.0000E+00</b> |
|          | Mean    | <b>0.0000E+00</b> | 3.1550E-16 | 7.0400E-10 | <b>0.0000E+00</b> | 9.0630E-04 | 1.2330E-61        | <b>0.0000E+00</b> | <b>0.0000E+00</b> |
|          | Stddev. | 0.0000E+00        | 4.9330E-17 | 1.7100E-10 | 0.0000E+00        | 1.9590E-04 | 6.0970E-61        | 0.0000E+00        | <b>0.0000E+00</b> |
| F2       | Best    | <b>0.0000E+00</b> | 7.3930E-16 | 1.0180E-06 | <b>0.0000E+00</b> | 6.0440E-02 | 5.0470E-49        | <b>0.0000E+00</b> | <b>0.0000E+00</b> |
|          | Worst   | <b>0.0000E+00</b> | 1.0920E-15 | 2.4600E-06 | <b>0.0000E+00</b> | 1.4210E-01 | 2.0950E-46        | <b>0.0000E+00</b> | <b>0.0000E+00</b> |
|          | Mean    | <b>0.0000E+00</b> | 9.5130E-16 | 1.4180E-06 | <b>0.0000E+00</b> | 1.0390E-01 | 3.2560E-47        | <b>0.0000E+00</b> | <b>0.0000E+00</b> |
|          | Stddev. | 0.0000E+00        | 6.8720E-17 | 3.0300E-07 | 0.0000E+00        | 2.4850E-02 | 4.6490E-47        | 0.0000E+00        | <b>0.0000E+00</b> |
| F3       | Best    | 4.0840E-11        | 4.2500E-01 | 1.6380E-11 | <b>3.7210E-79</b> | 1.5440E-03 | 6.4260E-36        | 3.2450E-06        | <b>0.0000E+00</b> |
|          | Worst   | 6.9630E-05        | 4.7320E+00 | 5.4410E-11 | 5.8480E-28        | 2.7900E-03 | <b>1.8350E-29</b> | 1.8360E+02        | <b>0.0000E+00</b> |
|          | Mean    | 1.3700E-05        | 1.3010E+00 | 3.1910E-11 | 1.9590E-29        | 1.9530E-03 | <b>7.0320E-31</b> | 6.1680E+00        | <b>0.0000E+00</b> |
|          | Stddev. | 1.8880E-05        | 8.5310E-01 | 1.1180E-11 | 1.0670E-28        | 3.2530E-04 | 3.3400E-30        | 3.3510E+01        | <b>0.0000E+00</b> |
| F4       | Best    | 3.5950E-17        | 5.9340E-04 | 2.0850E-06 | 9.1150E-81        | 2.6070E-03 | 2.2290E+00        | <b>4.6800E-83</b> | 4.4540E-60        |
|          | Worst   | 1.4870E-12        | 3.0870E-02 | 4.2900E-06 | 4.1310E-45        | 4.2460E-02 | 1.0700E+01        | <b>1.6300E-73</b> | 1.6845E-56        |
|          | Mean    | 5.1440E-14        | 1.4670E-02 | 2.9060E-06 | 1.3770E-46        | 1.3340E-02 | 6.1330E+00        | <b>8.5570E-75</b> | 8.5256E-49        |
|          | Stddev. | 2.7120E-13        | 9.0920E-03 | 5.9360E-07 | 7.5410E-46        | 6.1970E-03 | 1.8150E+00        | 3.0630E-74        | 3.1643E-45        |
| F5       | Best    | 1.3940E+01        | 1.7760E-04 | 2.9000E-05 | 2.5740E+01        | 1.3310E-03 | <b>0.0000E+00</b> | <b>0.0000E+00</b> | <b>0.0000E+00</b> |
|          | Worst   | 7.7980E+01        | 2.4220E-02 | 1.3390E+02 | 2.8840E+01        | 5.4630E-01 | 3.9870E+00        | <b>4.6120E-27</b> | 1.5527E-20        |
|          | Mean    | 3.4140E+01        | 8.2800E-03 | 9.1380E+00 | 2.6760E+01        | 3.0930E-01 | 1.0630E+00        | <b>7.1060E-28</b> | 6.6720E-22        |
|          | Stddev. | 2.3900E+01        | 7.3270E-03 | 2.9860E+01 | 7.9300E-01        | 1.4210E-01 | 1.7930E+00        | <b>1.0410E-27</b> | 2.9005E-21        |
| F6       | Best    | 3.8520E-31        | 2.7110E-16 | 1.7720E-11 | 2.3330E+00        | 7.3260E-04 | <b>0.0000E+00</b> | 1.2660E+00        | 1.6548E+00        |
|          | Worst   | 2.3270E-26        | 4.5990E-16 | 4.6740E-11 | 3.6950E+00        | 1.2020E-03 | <b>9.2450E-33</b> | 2.3660E+00        | 2.3487E+00        |
|          | Mean    | 9.7010E-28        | 3.3340E-16 | 2.8460E-11 | 2.7520E+00        | 9.6080E-04 | <b>1.0270E-33</b> | 1.7170E+00        | 1.3482E+00        |
|          | Stddev. | 4.2680E-27        | 5.6640E-17 | 7.9380E-12 | 2.7170E-01        | 1.1020E-04 | 2.1910E-33        | 2.4360E-01        | 2.8267E-01        |
| F7       | Best    | <b>2.2940E-07</b> | 1.4460E-02 | 1.6440E-05 | 1.2680E-05        | 2.0120E-05 | 1.9270E-03        | 3.1600E-04        | 4.1553E-04        |
|          | Worst   | <b>1.1960E-06</b> | 3.6490E-02 | 1.3620E-04 | 1.0450E-03        | 9.7650E-04 | 1.6700E-02        | 1.8850E-03        | 9.3533E-03        |
|          | Mean    | <b>5.8730E-06</b> | 2.7370E-02 | 6.0940E-05 | 1.9790E-04        | 2.8460E-04 | 7.0020E-03        | 8.0060E-04        | 2.8813E-04        |
|          | Stddev. | <b>2.1270E-06</b> | 4.9410E-03 | 2.4370E-05 | 1.9360E-04        | 2.1320E-04 | 3.8620E-03        | 3.7980E-04        | 2.1866E-04        |

**Table S2.** Comparative performance of the LO algorithm with swarm algorithms based on functions F8–F23

| Function |        | LO                 | ABC                | SSA                | SCA                | BA                 | FPA                | JAYA               | LEO-MPA            |
|----------|--------|--------------------|--------------------|--------------------|--------------------|--------------------|--------------------|--------------------|--------------------|
| F8       | Best   | <b>-1.2550E+04</b> | -1.2570E+04        | -3.7360E+03        | -5.2220E+03        | -1.2570E+04        | -1.2570E+04        | -1.2570E+04        | -1.2569E+04        |
|          | Worst  | <b>-1.0350E+04</b> | -1.2570E+04        | -2.7840E+03        | -4.3560E+03        | -1.2570E+04        | -1.2040E+04        | -9.6520E+03        | -1.1977E+04        |
|          | Mean   | -1.1930E+04        | -1.2570E+04        | -3.3000E+03        | -4.8300E+03        | -1.2570E+04        | -1.2530E+04        | -1.2410E+04        | <b>-1.2289E+04</b> |
|          | Stdev. | 7.6340E+02         | 0.0000E+00         | 2.9630E+02         | 2.2400E+02         | 0.0000E+00         | 1.2420E+02         | 5.3670E+02         | 1.4416E+02         |
| F9       | Best   | 9.0710E+00         | <b>0.0000E+00</b>  | 3.9800E+00         | <b>0.0000E+00</b>  | 1.3970E-03         | 3.9800E+00         | 2.0890E+01         | <b>0.0000E+00</b>  |
|          | Worst  | 5.6280E+01         | <b>0.0000E+00</b>  | 1.8900E+01         | <b>0.0000E+00</b>  | 2.1810E-01         | 3.4820E+01         | 6.9960E+01         | <b>0.0000E+00</b>  |
|          | Mean   | 3.0340E+01         | <b>0.0000E+00</b>  | 1.1410E+01         | <b>0.0000E+00</b>  | 3.4020E-02         | 1.7350E+01         | 4.1040E+01         | <b>0.0000E+00</b>  |
|          | Stdev. | 1.3310E+01         | 0.0000E+00         | 4.2910E+00         | 0.0000E+00         | 4.1970E-02         | 6.4940E+00         | 1.2780E+01         | <b>0.0000E+00</b>  |
| F10      | Best   | <b>4.4410E-15</b>  | 2.2200E-14         | 1.1460E-06         | 4.4410E-15         | 1.2920E-02         | 4.4410E-15         | 4.4410E-15         | 4.4409E-14         |
|          | Worst  | <b>7.9940E-15</b>  | 3.2860E-14         | 2.7050E-06         | 2.0090E+01         | 2.6320E-02         | 2.9570E+00         | 1.5100E-14         | 4.4409E-14         |
|          | Mean   | <b>6.8090E-15</b>  | 2.8480E-14         | 2.1420E-06         | 4.7440E+00         | 2.2490E-02         | 2.0940E+00         | 1.0480E-14         | 4.4409E-16         |
|          | Stdev. | 1.7030E-15         | 3.1890E-15         | 3.3870E-07         | 8.5930E+00         | 3.4880E-03         | 5.7070E-01         | 3.6320E-15         | 3.3435E-15         |
| F11      | Best   | <b>0.0000E+00</b>  | <b>0.0000E+00</b>  | <b>4.4280E-02</b>  | <b>0.0000E+00</b>  | 3.7140E-05         | <b>0.0000E+00</b>  | <b>0.0000E+00</b>  | <b>0.0000E+00</b>  |
|          | Worst  | <b>0.0000E+00</b>  | <b>0.0000E+00</b>  | 5.7590E-01         | <b>0.0000E+00</b>  | 2.2170E-02         | 9.9980E-02         | 3.9200E-02         | <b>0.0000E+00</b>  |
|          | Mean   | <b>0.0000E+00</b>  | <b>0.0000E+00</b>  | 2.4430E-01         | <b>0.0000E+00</b>  | 3.8230E-03         | 2.2510E-02         | 9.6030E-03         | <b>0.0000E+00</b>  |
|          | Stdev. | <b>0.0000E+00</b>  | 0.0000E+00         | 1.1440E-01         | 0.0000E+00         | 6.4560E-03         | 2.0960E-02         | 9.8800E-03         | <b>0.0000E+00</b>  |
| F12      | Best   | 2.7810E-32         | 2.0090E-16         | 6.7110E-14         | 1.7040E-01         | 6.1360E-06         | <b>1.5710E-32</b>  | 1.0740E-01         | 2.7810E-29         |
|          | Worst  | <b>8.3430E-29</b>  | 3.3300E-16         | 3.7090E-13         | 7.2100E-01         | 9.9550E-06         | 4.1470E-01         | 1.9790E+00         | 1.5705E-28         |
|          | Mean   | <b>6.3590E-30</b>  | 3.0070E-16         | 2.0440E-13         | 2.3450E-01         | 8.0380E-06         | 3.1100E-02         | 8.0000E-01         | 1.5705E-29         |
|          | Stdev. | 1.7130E-29         | 3.1380E-17         | 8.0970E-14         | 9.7070E-02         | 8.1740E-07         | 9.4890E-02         | 6.2290E-01         | 5.5674E-28         |
| F13      | Best   | 2.9960E-31         | 2.2470E-16         | 4.4770E-13         | 1.4200E+00         | 7.7970E-05         | 1.3500E-32         | 1.3500E-32         | <b>1.3498E-32</b>  |
|          | Worst  | <b>3.5820E-23</b>  | 3.2830E-16         | 2.2000E-12         | 1.9370E+00         | 1.1150E-02         | 2.1020E-02         | 1.0990E-02         | <b>1.3498E-32</b>  |
|          | Mean   | <b>2.8610E-24</b>  | 2.9820E-16         | 1.1170E-12         | 1.7140E+00         | 1.2240E-03         | 1.2660E-03         | 1.0990E-03         | <b>1.3498E-32</b>  |
|          | Stdev. | <b>1.5670E-23</b>  | 2.1200E-17         | 4.4170E-13         | 1.3180E-01         | 3.3620E-03         | 5.2000E-03         | 3.3530E-03         | 5.5674E-18         |
| F14      | Best   | <b>9.9800E-01</b>  | 9.9800E-01         |
|          | Worst  | <b>9.9800E-01</b>  | 9.9800E-01         |
|          | Mean   | <b>9.9800E-01</b>  | 9.9800E-01         |
|          | Stdev. | 5.8290E-11         | 0.0000E+00         | 7.1420E-17         | 6.0530E-10         | 0.0000E+00         | 0.0000E+00         | 8.0770E-10         | 0.0000E+00         |
| F15      | Best   | <b>3.0750E-04</b>  | 3.1350E-04         | 3.0750E-04         | 3.0800E-04         | 3.0750E-04         | 3.0750E-04         | 3.0750E-04         | 3.0789E-04         |
|          | Worst  | 7.1880E-04         | 3.8880E-04         | 1.2230E-03         | 3.1260E-04         | 3.0760E-04         | <b>3.0750E-04</b>  | 1.2240E-03         | 3.0789E-04         |
|          | Mean   | 3.6590E-04         | 3.4470E-04         | 5.5170E-04         | 3.0990E-04         | 3.0750E-04         | <b>3.0750E-04</b>  | 3.3800E-04         | 3.0789E-04         |
|          | Stdev. | 1.2280E-04         | 2.1330E-05         | 4.1190E-04         | 1.3600E-06         | 1.8020E-08         | <b>1.0800E-19</b>  | 1.6730E-04         | 9.2262E-18         |
| F16      | Best   | <b>-1.0320E+00</b> | -1.0320E+00        | -1.0320E+00        | -1.0320E+00        | -1.0320E+00        | -1.0320E+00        | -1.0320E+00        | -1.0316E+00        |
|          | Worst  | <b>-1.0320E+00</b> | -1.0320E+00        | -1.0320E+00        | -1.0320E+00        | -1.0320E+00        | -1.0320E+00        | -1.0320E+00        | -1.0316E+00        |
|          | Mean   | <b>-1.0320E+00</b> | -1.0320E+00        | -1.0320E+00        | -1.0320E+00        | -1.0320E+00        | -1.0320E+00        | -1.0320E+00        | -1.0316E+00        |
|          | Stdev. | 6.7750E-16         | 6.7750E-16         | 0.0000E+00         | 1.4940E-07         | 3.5650E-09         | 6.7750E-16         | 0.0000E+00         | 6.7752E-16         |
| F17      | Best   | <b>3.9790E-01</b>  | 3.9790E-01         | 3.9790E-01         | 3.9790E-01         | 3.9790E-01         | 3.9790E-01         | 3.9790E-01         | 3.9889E-01         |
|          | Worst  | <b>3.9790E-01</b>  | 3.9790E-01         | 3.9790E-01         | 3.9790E-01         | 3.9790E-01         | 3.9790E-01         | 3.9800E-01         | 3.9889E-01         |
|          | Mean   | <b>3.9790E-01</b>  | 3.9790E-01         | 3.9790E-01         | 3.9790E-01         | 3.9790E-01         | 3.9790E-01         | 3.9890E-01         | 3.9789E-01         |
|          | Stdev. | <b>0.0000E+00</b>  | <b>0.0000E+00</b>  | <b>0.0000E+00</b>  | 5.7810E-06         | 1.6200E-09         | <b>0.0000E+00</b>  | 1.5460E-05         | <b>0.0000E+00</b>  |
| F18      | Best   | <b>3.0000E+00</b>  |
|          | Worst  | <b>3.0000E+00</b>  |
|          | Mean   | <b>3.0000E+00</b>  |
|          | Stdev. | 1.8140E-15         | 1.8200E-13         | 0.0000E+00         | 9.0570E-10         | 1.2650E-07         | 4.8090E-16         | <b>0.0000E+00</b>  | 1.1397E-15         |
| F19      | Best   | <b>-3.8630E+00</b> | <b>-3.8628E+00</b> |
|          | Worst  | <b>-3.8630E+00</b> | <b>-3.8630E+00</b> | <b>-3.8630E+00</b> | <b>-3.8550E+00</b> | <b>-3.8630E+00</b> | <b>-3.8630E+00</b> | <b>-3.8630E+00</b> | <b>-3.8628E+00</b> |
|          | Mean   | <b>-3.8630E+00</b> | <b>-3.8630E+00</b> | <b>-3.8630E+00</b> | <b>-3.8560E+00</b> | <b>-3.8630E+00</b> | <b>-3.8630E+00</b> | <b>-3.8630E+00</b> | <b>-3.8628E+00</b> |
|          | Stdev. | 2.7100E-15         | 2.7100E-15         | 2.0450E-15         | 2.6900E-03         | 4.0700E-07         | 2.7100E-15         | 2.7100E-15         | 2.7101E-15         |
| F20      | Best   | <b>-3.3220E+00</b> | <b>-3.3220E+00</b> | <b>-3.3220E+00</b> | <b>-3.1320E+00</b> | <b>-3.3220E+00</b> | <b>-3.3220E+00</b> | <b>-3.3220E+00</b> | <b>-3.3220E+00</b> |
|          | Worst  | -3.2030E+00        | <b>-3.3220E+00</b> | -3.2030E+00        | -1.5780E+00        | -3.2030E+00        | <b>-3.3220E+00</b> | -3.2030E+00        | -3.2031E+00        |
|          | Mean   | -3.3180E+00        | <b>-3.3220E+00</b> | -3.2150E+00        | -2.9250E+00        | -3.2820E+00        | <b>-3.3220E+00</b> | -3.2670E+00        | -3.3061E+00        |
|          | Stdev. | 2.1710E-02         | 1.3550E-15         | 3.6280E-02         | 3.5930E-01         | 5.6980E-02         | 0.0000E+00         | 6.0300E-02         | 4.1107E-02         |
| F21      | Best   | <b>-1.0150E+01</b> | <b>-1.0150E+01</b> | <b>-1.0150E+01</b> | -1.0120E+01        | <b>-1.0150E+01</b> | <b>-1.0150E+01</b> | <b>-1.0150E+01</b> | -1.0153E+01        |
|          | Worst  | -2.6830E+00        | <b>-1.0150E+01</b> | <b>-1.0150E+01</b> | -4.9650E-01        | <b>-1.0150E+01</b> | <b>-1.0150E+01</b> | -2.6310E+00        | -1.0153E+01        |
|          | Mean   | -9.9040E+00        | <b>-1.0150E+01</b> | <b>-1.0150E+01</b> | -3.3210E+00        | <b>-1.0150E+01</b> | <b>-1.0150E+01</b> | -8.1430E+00        | -1.0153E+01        |
|          | Stdev. | 1.3640E+00         | 2.6310E-07         | 3.4780E-13         | 3.2900E+00         | 2.6310E-07         | 0.0000E+00         | 2.9760E+00         | 7.2269E-15         |
| F22      | Best   | -1.0400E+01        | <b>-1.0400E+01</b> | <b>-1.0400E+01</b> | -1.0170E+01        | -1.0150E+01        | <b>-1.0400E+01</b> | <b>-1.0400E+01</b> | -1.0403E+01        |
|          | Worst  | <b>-1.0400E+01</b> | <b>-1.0400E+01</b> | <b>-1.0400E+01</b> | -5.2400E-01        | -1.0150E+01        | <b>-1.0400E+01</b> | -1.8380E+01        | -5.0877E+00        |
|          | Mean   | <b>-1.0400E+01</b> | <b>-1.0400E+01</b> | <b>-1.0400E+01</b> | -5.3910E+01        | -1.0150E+01        | <b>-1.0400E+01</b> | -8.5510E+01        | -1.0626E+01        |
|          | Stdev. | <b>6.2650E-07</b>  | 1.8510E-05         | 2.8260E-13         | 3.5420E+00         | 2.6310E-07         | 0.0000E+00         | 2.8230E+00         | 9.7043E-01         |
| F23      | Best   | <b>-1.0540E+01</b> | -1.0540E+01        | -1.0540E+01        | -1.0410E+01        | -1.0150E+01        | -1.0540E+01        | -1.0540E+01        | -1.0536E+01        |
|          | Worst  | <b>-1.0540E+01</b> | -1.0540E+01        | -5.1760E+00        | -9.4700E-01        | -1.0150E+01        | -1.0540E+01        | -2.4210E+01        | -1.0536E+01        |
|          | Mean   | <b>-1.0540E+01</b> | -1.0540E+00        | -1.0000E+01        | -6.2120E+01        | -1.0150E+01        | -1.0540E+01        | -9.9950E+01        | -1.0636E+01        |
|          | Stdev. | <b>1.0210E-11</b>  | 2.2020E-05         | 1.6360E+00         | 2.7930E+00         | 2.6310E-07         | 0.0000E+00         | 2.0590E+00         | 9.3299E-10         |

**Table S3.** p\_values of the Wilcoxon statistical test between the proposed LO algorithm and ABC, SCA, BA, FPA, JAYA, and LEO-MPA

| Function | ABC     |         | SSA     |         | SCA     |         | BAT     |         | FPA     |         | JAYA    |         | LEO-MPA |         |
|----------|---------|---------|---------|---------|---------|---------|---------|---------|---------|---------|---------|---------|---------|---------|
|          | P Value | Results |
| F1       | 1.0E-05 | +       | 1.0E-05 | +       | N/A     | -       | 1.0E-05 | +       | 1.0E-05 | +       | N/A     | -       | N/A     | -       |
| F2       | 1.0E-05 | +       | 1.0E-05 | +       | N/A     | -       | 1.0E-05 | +       | 1.0E-05 | +       | 1.0E-05 | +       | 1.0E-05 | +       |
| F3       | 1.0E-05 | +       |
| F4       | 1.0E-05 | +       | 0.5     | -       | 0.5     | -       |
| F5       | 1.0E-05 | +       | N/A     | -       | N/A     | -       |
| F6       | 1.0E-05 | +       | 1.0E-05 | +       | 1.0E-05 | +       | 1.0E-05 | +       | 0.5     | -       | 1.0E-05 | +       | 1.0E-05 | +       |
| F7       | 1.0E-05 | +       | 0.41    | -       | N/A     | -       | 1.0E-05 | +       | 1.0E-05 | +       | 1.0E-05 | +       | 1.0E-05 | +       |
| F8       | 1.0E-05 | +       | 1.0E-05 | +       | 1.0E-05 | +       | N/A     | -       | 1.0E-05 | +       | 1.0E-05 | +       | 1.0E-05 | +       |
| F9       | 0.12843 | -       | 1.0E-05 | +       | 0.5     | -       | 1.0E-05 | +       | 1.0E-05 | +       | 1.0E-05 | +       | 1.0E-05 | +       |
| F10      | 1.0E-05 | +       |
| F11      | 1.0E-05 | +       | 1.0E-05 | +       | 0.0128  | -       | 1.0E-05 | +       | 1.0E-05 | +       | 1.0E-05 | +       | 0.5     | -       |
| F12      | 1.0E-05 | +       |
| F13      | 1.0E-05 | +       |
| F14      | 1.0E-05 | +       | 0.5     | -       |
| F15      | 1.0E-05 | +       |
| F16      | 1.0E-05 | +       | 0.5     | -       |
| F17      | 1.0E-05 | +       |
| F18      | 1.0E-05 | +       |
| F19      | 1.0E-05 | +       |
| F20      | 1.0E-05 | +       |
| F21      | 1.0E-05 | +       |
| F22      | 1.0E-05 | +       |
| F23      | 1.0E-05 | +       |
